# Supplementary material for: Ionic Liquids and Water: Hydrophobicity vs. Hydrophilicity
Source: MDPI journal article supplement (doi:10.3390/molecules26237159), 2021-11-26
Supplement: s1 [file s1]

**Supplementary Materials  
for**

**Ionic Liquids and water: hydrophobicity *vs* hydrophilicity**

**Rita F. Rodrigues <sup>1</sup>, Adilson A. Freitas <sup>1,\*</sup>, José N. Canongia Lopes <sup>1</sup> and Karina Shimizu <sup>1,\*</sup>**

*Centro de Química Estrutural, Instituto Superior Técnico, Universidade de Lisboa, 1049-001 Lisbon,  
Portugal*

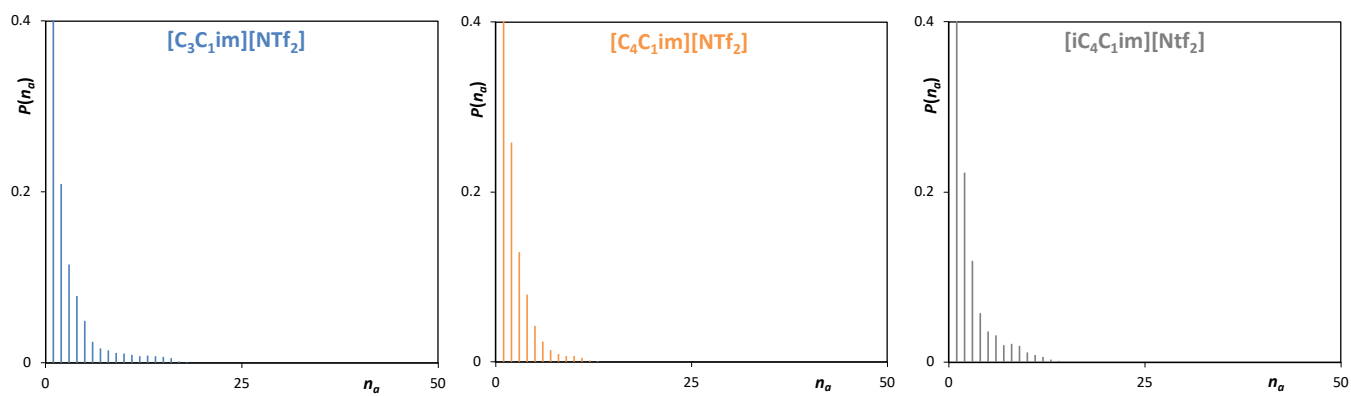

**Figure S1.** Discrete probability distribution of aggregate sizes,  $P(n_a)$ , as a function of aggregate size number,  $n_a$ , for water-water aggregates found in aqueous solutions of  $[C_3C_1im][NTf_2]$ ,  $[C_4C_1im][NTf_2]$  and  $[iC_4C_1im][NTf_2]$  with  $X_{IL} = 0.70$  at 320 K.

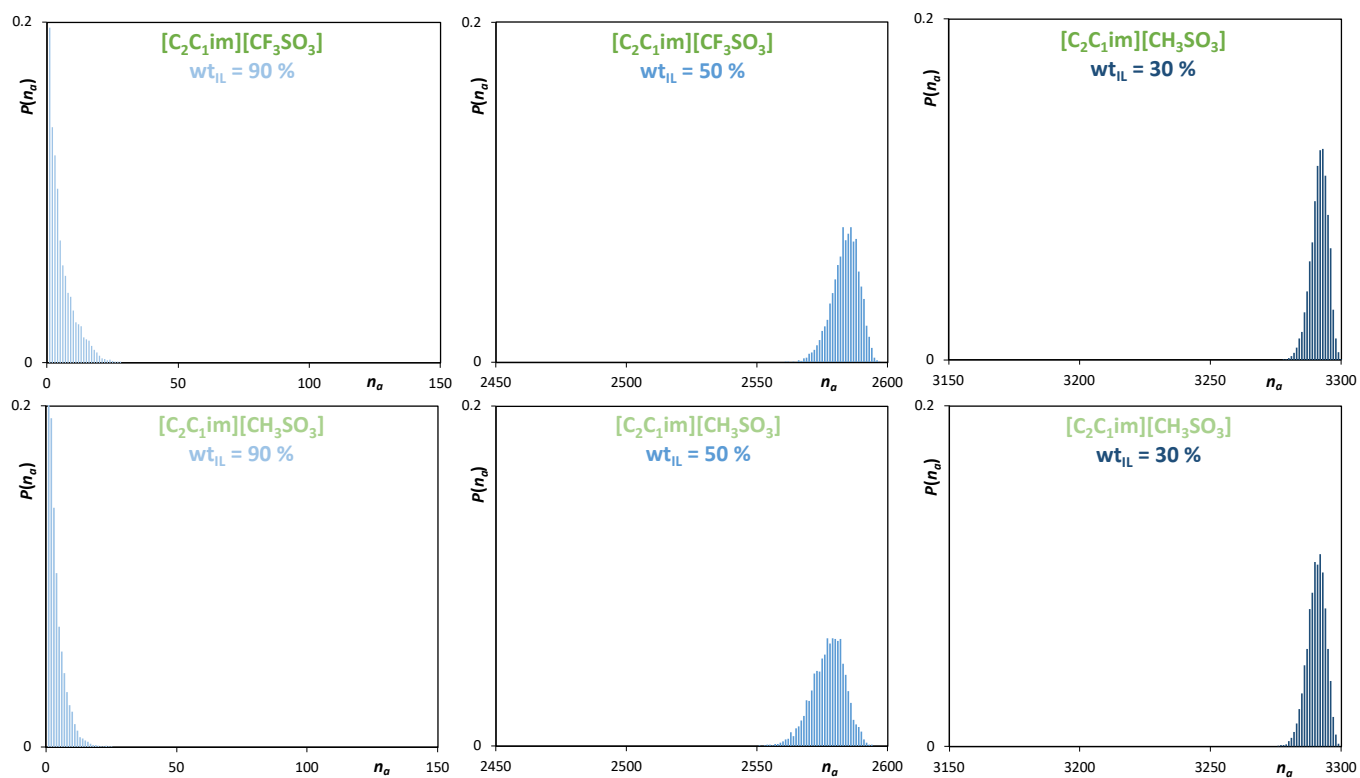

**Figure S2.** Discrete probability distribution of aggregate sizes,  $P(n_a)$ , as a function of aggregate size number,  $n_a$ , for water-water aggregates found in aqueous solutions of  $[C_2C_1im][CF_3SO_3]$  and  $[C_2C_1im][CH_3SO_3]$  at 300 K.

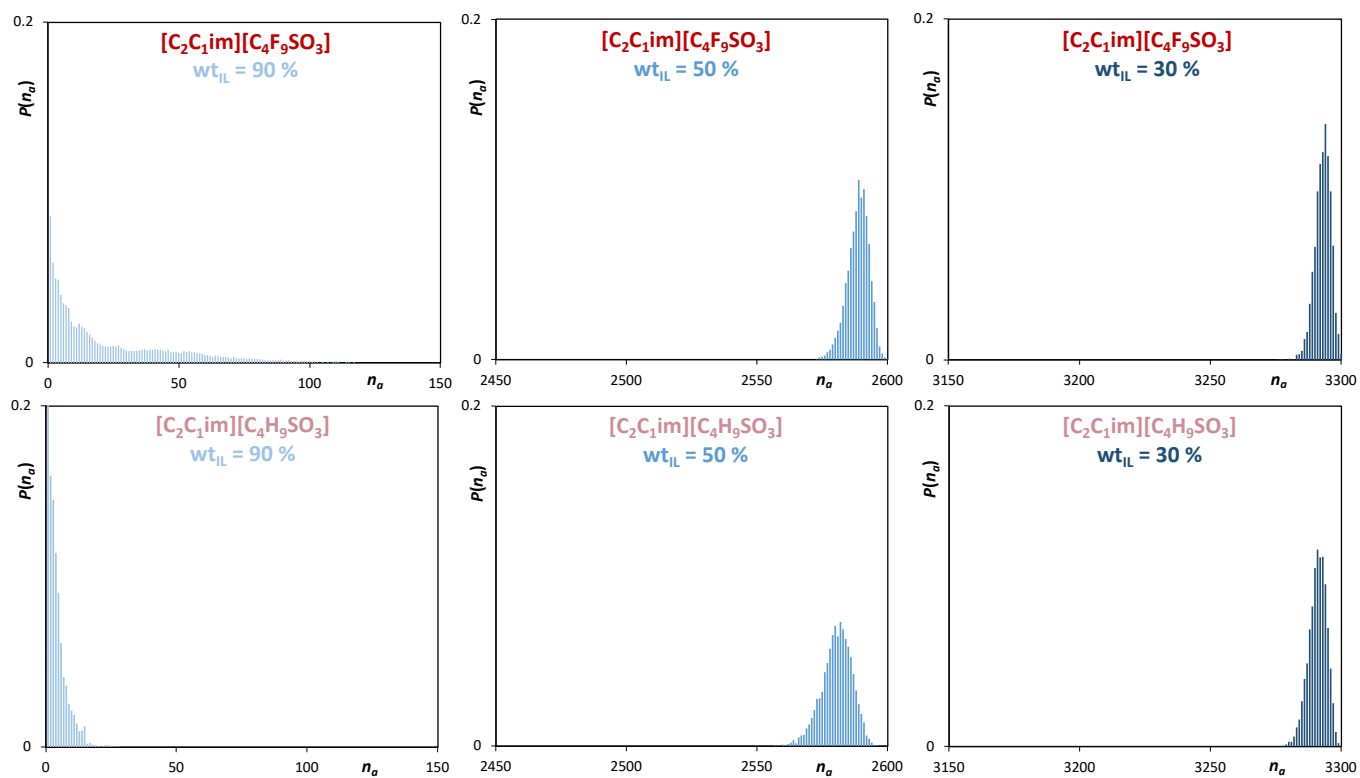

**Figure S3.** Discrete probability distribution of aggregate sizes,  $P(n_a)$ , as a function of aggregate size number,  $n_a$ , for water-water aggregates found in aqueous solutions of  $[\text{C}_2\text{C}_{1\text{im}}][\text{C}_4\text{F}_9\text{SO}_3]$  and  $[\text{C}_2\text{C}_{1\text{im}}][\text{C}_4\text{H}_9\text{SO}_3]$  at 300 K.

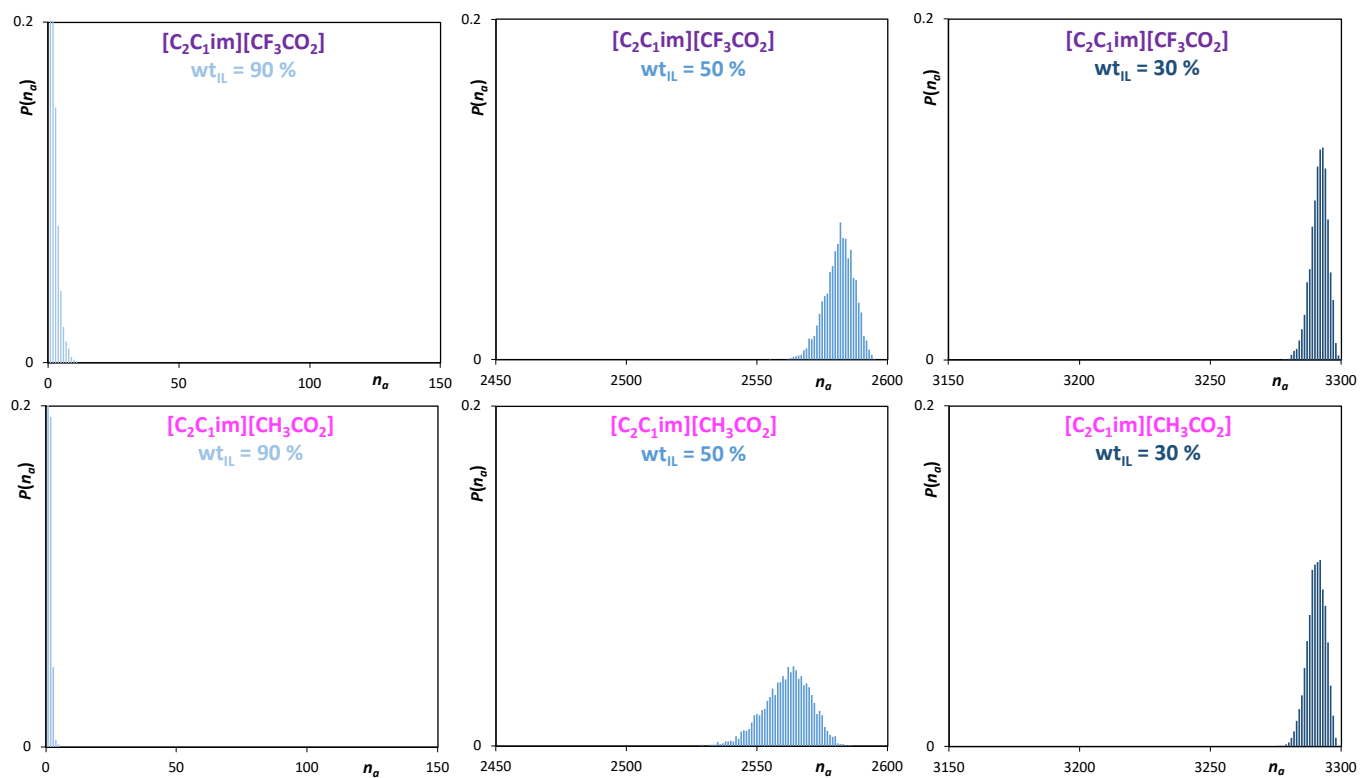

**Figure S4.** Discrete probability distribution of aggregate sizes,  $P(n_a)$ , as a function of aggregate size number,  $n_a$ , for water-water aggregates found in aqueous solutions of  $[C_2C_1im][CF_3CO_2]$  and  $[C_2C_1im][CH_3CO_2]$  at 300 K.

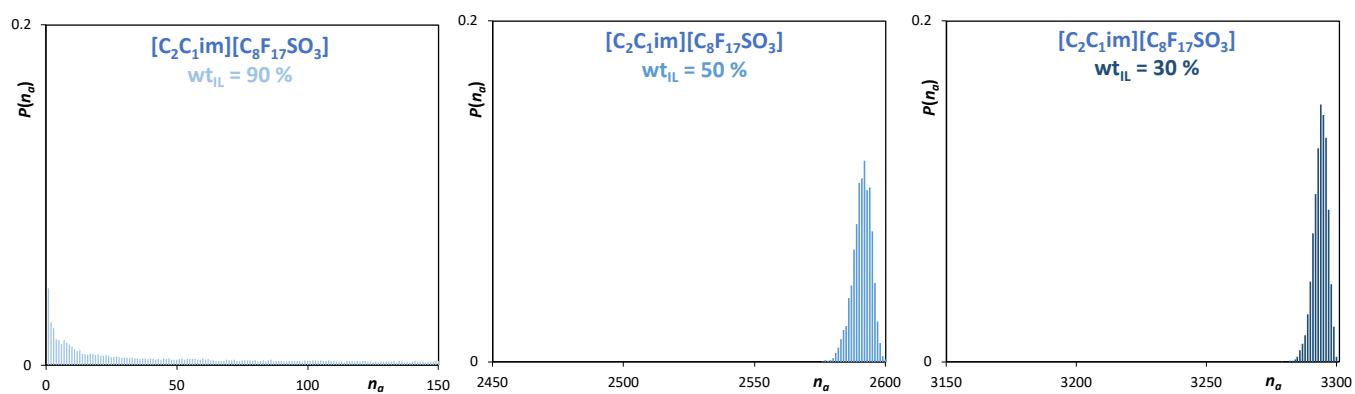

**Figure S5.** Discrete probability distribution of aggregate sizes,  $P(n_a)$ , as a function of aggregate size number,  $n_a$ , for water-water aggregates found in aqueous solutions of  $[C_2C_{1im}][C_8F_{17}SO_3]$  at 300 K.

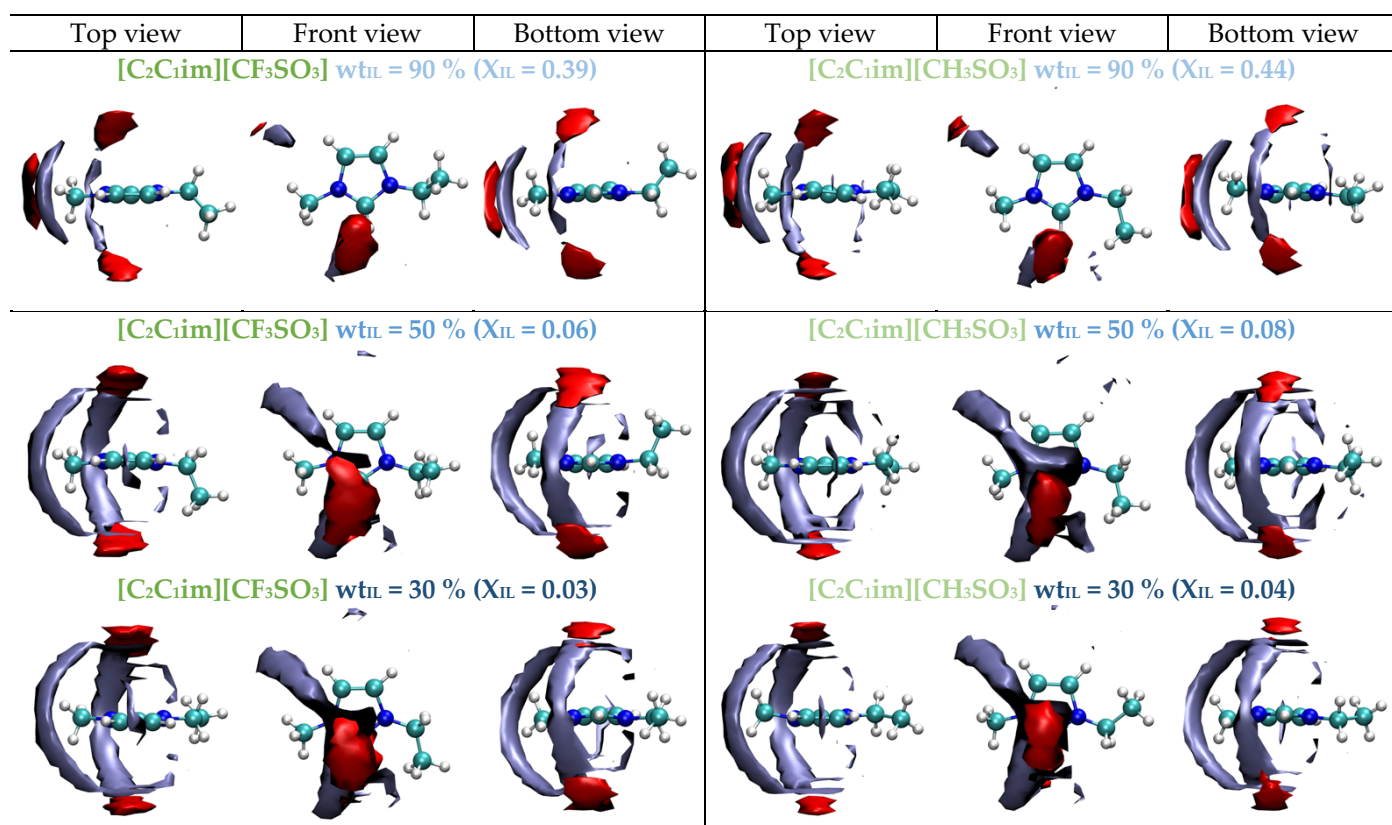

**Figure S6.** Selected Spatial Distribution Functions around the  $[\text{C}_2\text{C}_{1\text{im}}]^+$  cation in aqueous mixtures of  $[\text{C}_2\text{C}_{1\text{im}}][\text{CF}_3\text{SO}_3]$  and  $[\text{C}_2\text{C}_{1\text{im}}][\text{CH}_3\text{SO}_3]$  at 300 K. The red and light blue colours represent S ( $-\text{SO}_3$ ) atom of anion and water O atom, respectively. The isosurface value is 70% of the maximum number density.

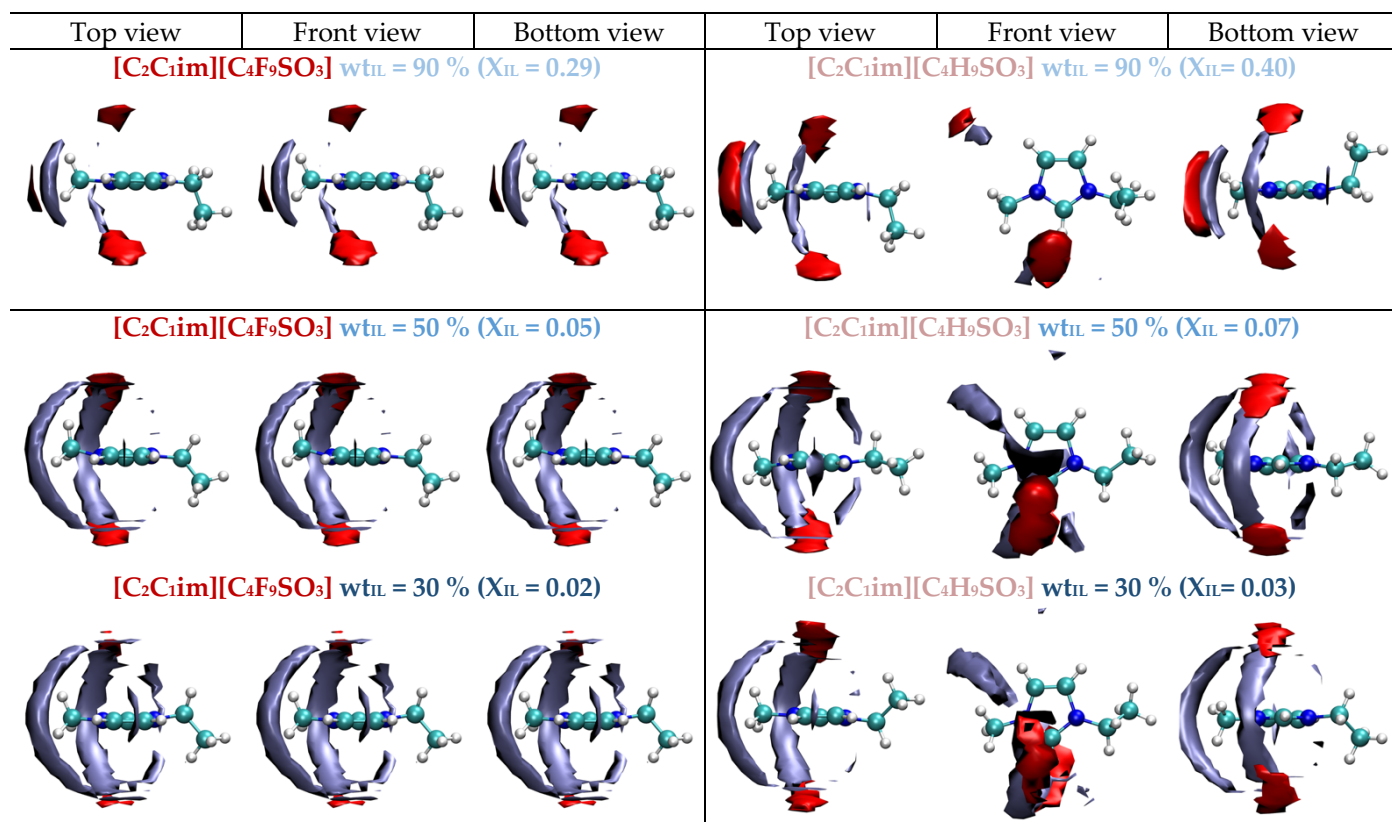

**Figure S7.** Selected Spatial Distribution Functions around the [C<sub>2</sub>C<sub>1</sub>im]<sup>+</sup> cation in aqueous mixtures of [C<sub>2</sub>C<sub>1</sub>im][C<sub>4</sub>F<sub>9</sub>SO<sub>3</sub>] and [C<sub>2</sub>C<sub>1</sub>im][C<sub>4</sub>H<sub>9</sub>SO<sub>3</sub>] at 300 K. The red and light blue colours represent S (-SO<sub>3</sub>) atom of anion and water O atom, respectively. The isosurface value is 70% of the maximum number density.



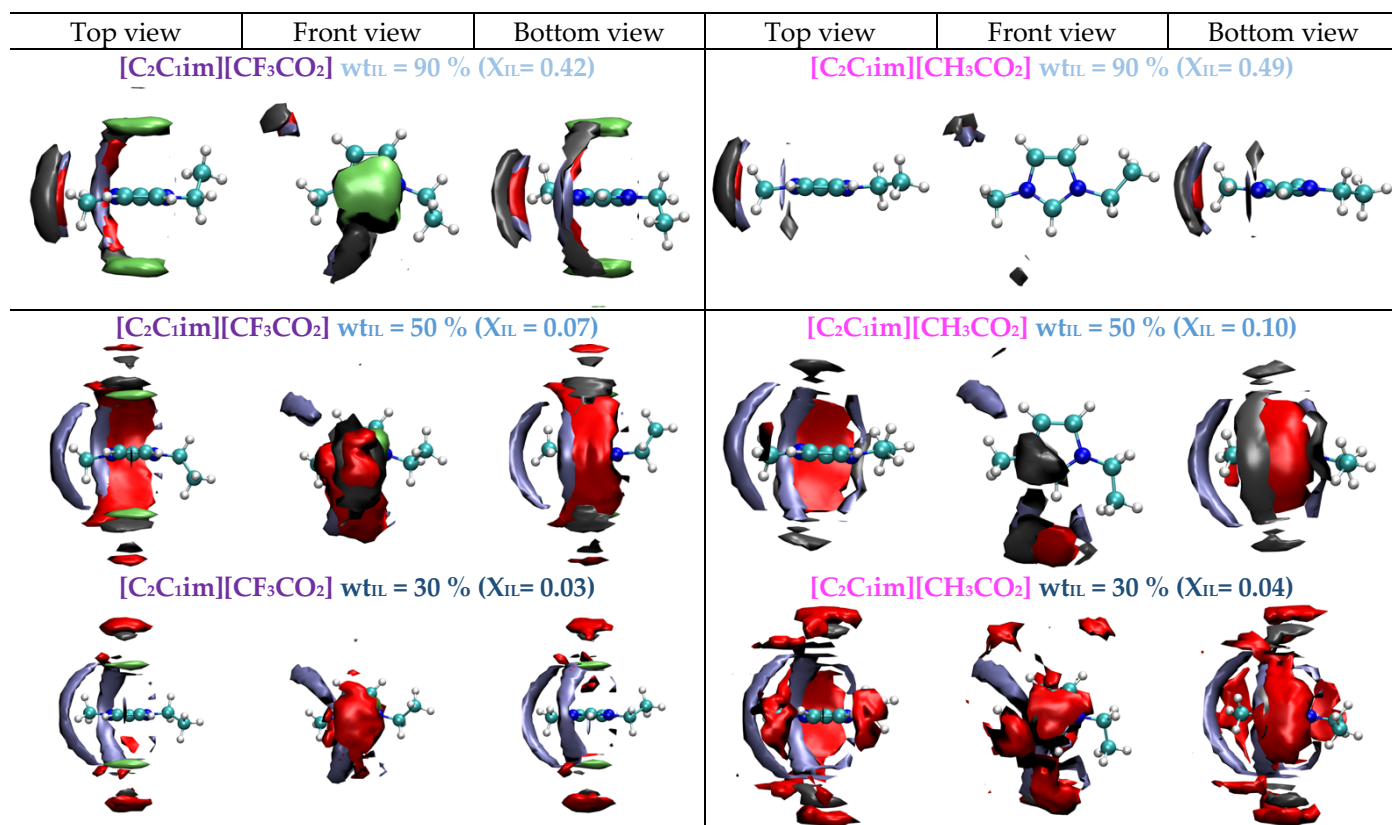

**Figure S8.** Selected Spatial Distribution Functions around the [C<sub>2</sub>C<sub>1</sub>im]<sup>+</sup> cation in aqueous mixtures of [C<sub>2</sub>C<sub>1</sub>im][CF<sub>3</sub>CO<sub>2</sub>] and [C<sub>2</sub>C<sub>1</sub>im][CH<sub>3</sub>CO<sub>2</sub>] at 300 K. The grey, red and green colours represent C, O (-CO<sub>2</sub>) and F atoms of anion, respectively, and light blue depicts water O atom. The isosurface value is 70% of the maximum number density.

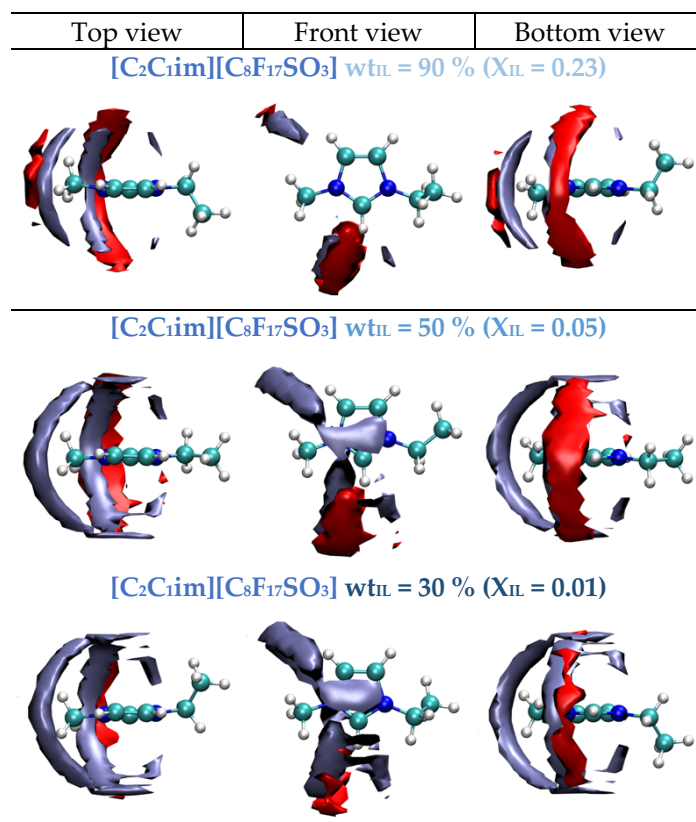

**Figure S9.** Selected Spatial Distribution Functions around the  $[\text{C}_2\text{C}_{1\text{im}}]^+$  cation in aqueous mixtures of  $[\text{C}_2\text{C}_{1\text{im}}][\text{C}_8\text{F}_{17}\text{SO}_3]$  at 300 K. The red colour represent S ( $-\text{SO}_3$ ) atom of anion and light blue depicts water O atom. The isosurface value is 70% of the maximum number density.

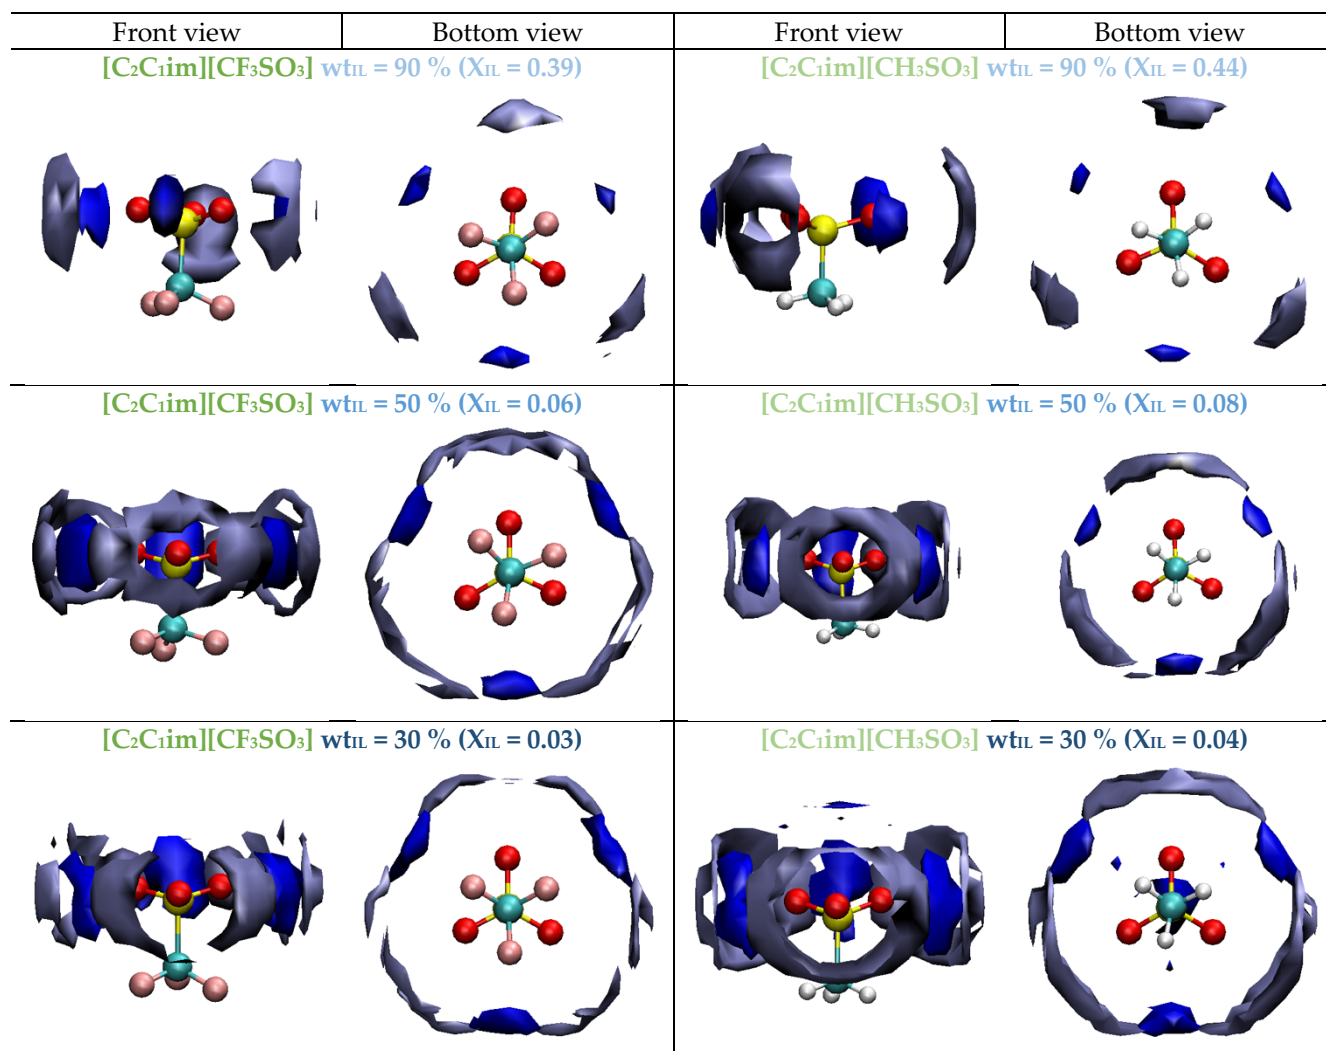

**Figure S10.** Selected Spatial Distribution Functions around the  $[\text{CF}_3\text{SO}_3]^-$  and  $[\text{CH}_3\text{SO}_3]^-$  anions in aqueous mixtures of  $[\text{C}_2\text{C1im}][\text{CF}_3\text{SO}_3]$  and  $[\text{C}_2\text{C1im}][\text{CH}_3\text{SO}_3]$  at 300 K. The blue colour represents H atom of cations attached to the carbon between nitrogen atoms of the imidazolium ring and light blue depicts water O atom. The isosurface value is 70% of the maximum number density.

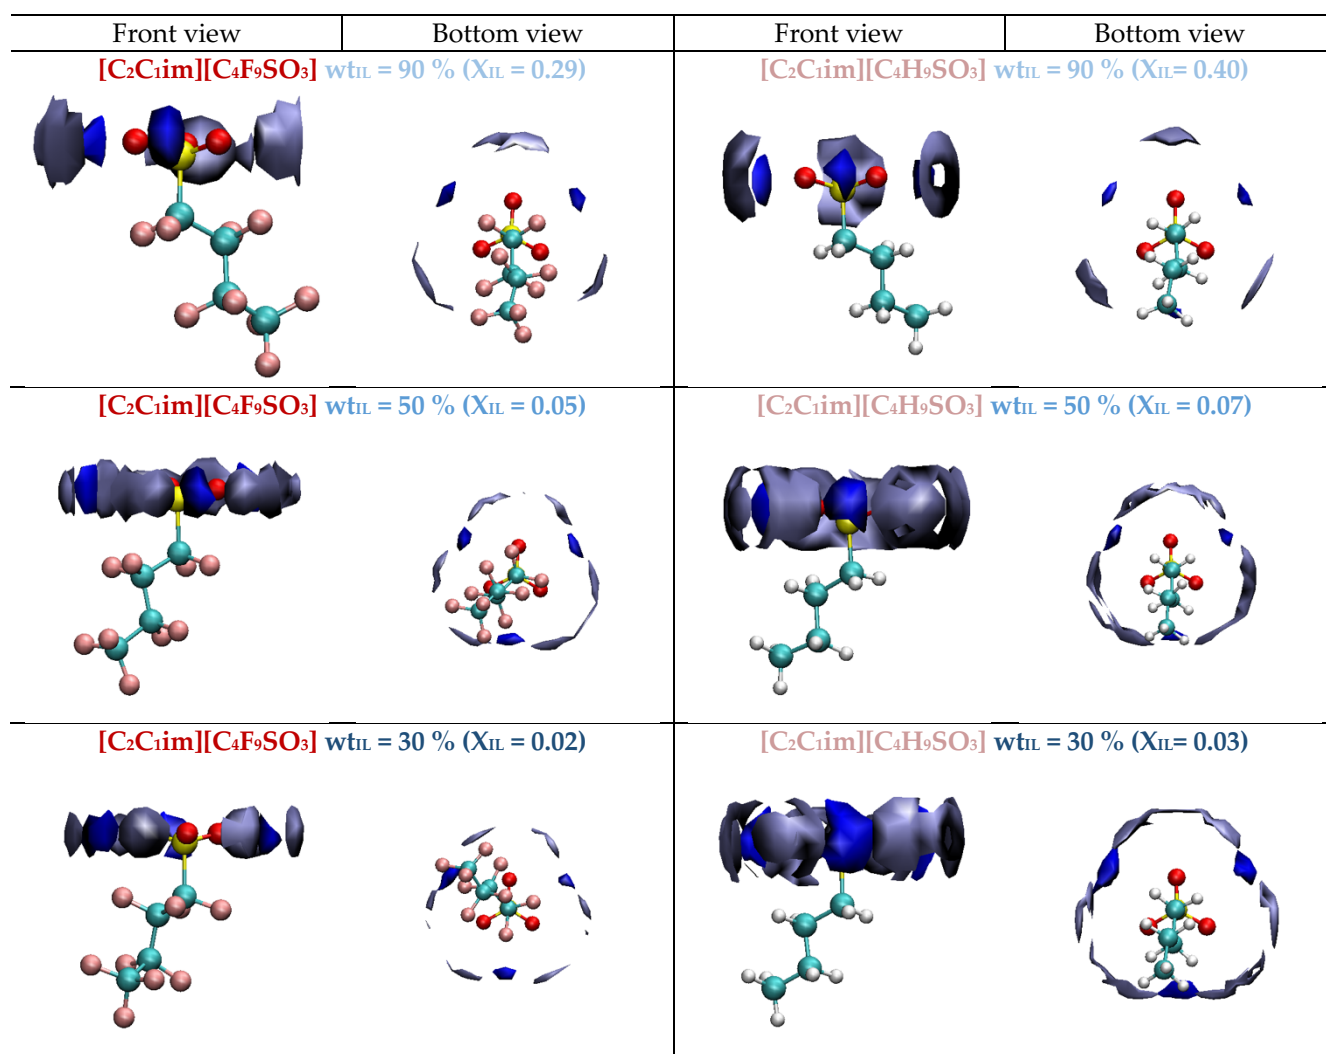

**Figure S11.** Selected Spatial Distribution Functions around the [C<sub>4</sub>F<sub>9</sub>SO<sub>3</sub>]<sup>-</sup> and [C<sub>4</sub>H<sub>9</sub>SO<sub>3</sub>]<sup>-</sup> anions in aqueous mixtures of [C<sub>2</sub>C<sub>1</sub>im][C<sub>4</sub>F<sub>9</sub>SO<sub>3</sub>] and [C<sub>2</sub>C<sub>1</sub>im][C<sub>4</sub>H<sub>9</sub>SO<sub>3</sub>] at 300 K. The blue colour represents H atom of cations attached to the carbon between nitrogen atoms of the imidazolium ring and light blue depicts water O atom. The isosurface value is 70% of the maximum number density.

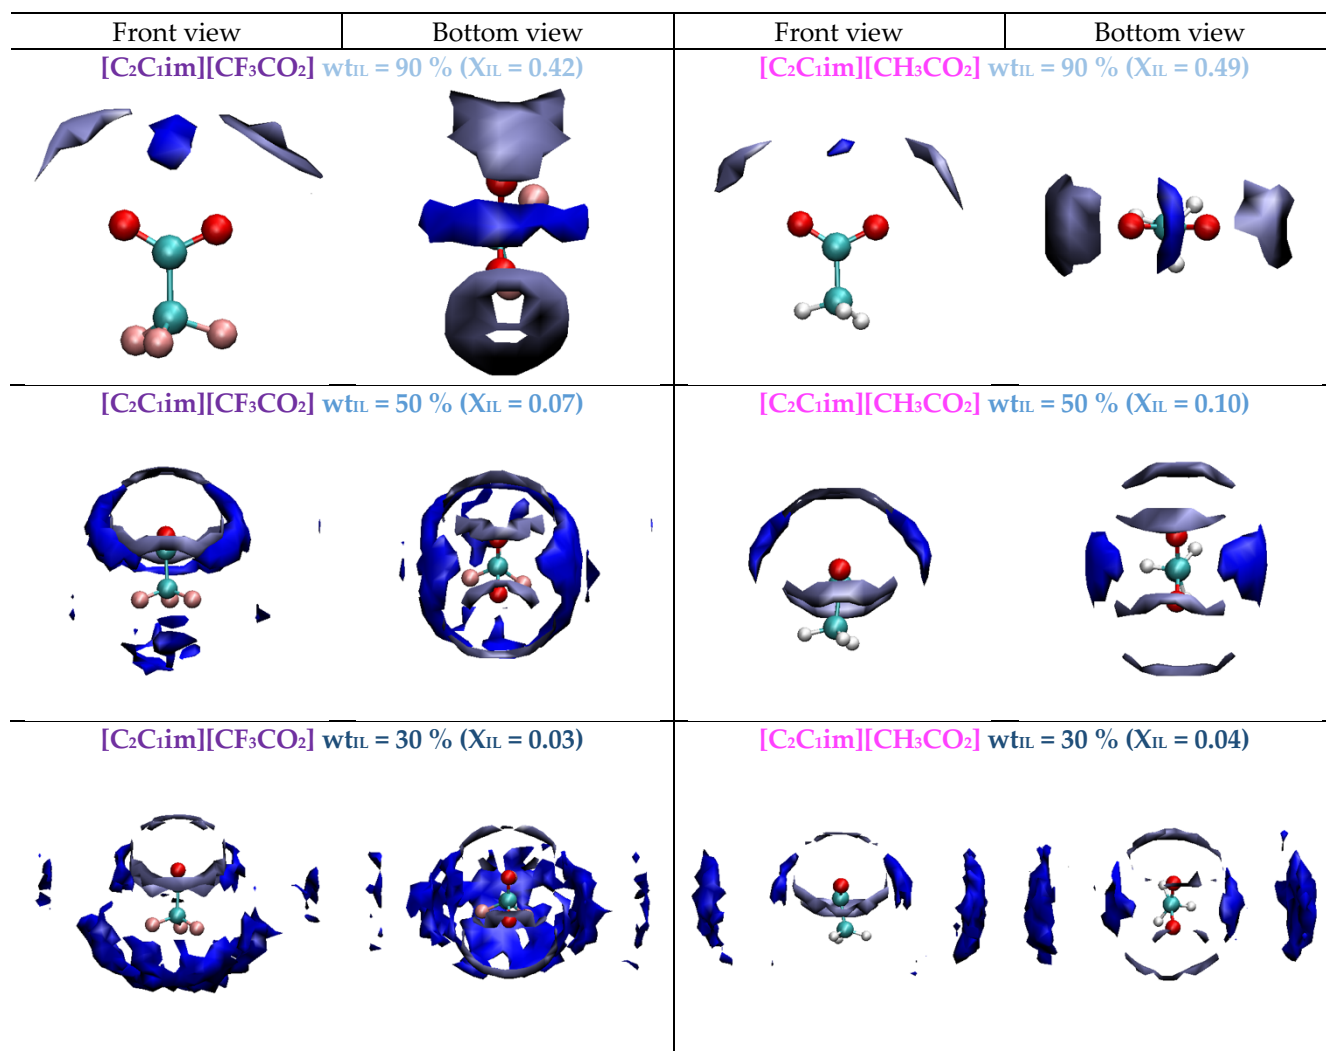

**Figure S12.** Selected Spatial Distribution Functions around the [CF<sub>3</sub>CO<sub>2</sub>]<sup>-</sup> and [CH<sub>3</sub>CO<sub>2</sub>]<sup>-</sup> anions in aqueous mixtures of [C<sub>2</sub>C<sub>1</sub>im][CF<sub>3</sub>CO<sub>2</sub>] and [C<sub>2</sub>C<sub>1</sub>im][CH<sub>3</sub>CO<sub>2</sub>] at 300 K. The blue colour represents H atom of cations attached to the carbon between nitrogen atoms of the imidazolium ring and light blue depicts water O atom. The isosurface value is 70% of the maximum number density.

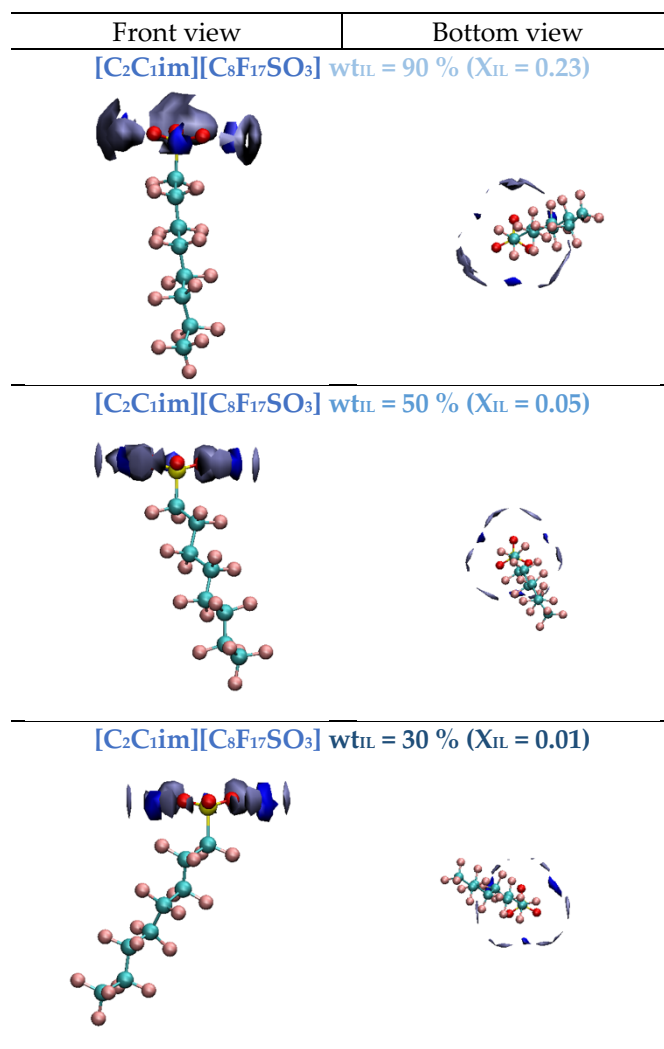

**Figure S13.** Selected Spatial Distribution Functions around the  $[\text{C}_8\text{F}_{17}\text{SO}_3]^-$  anion in aqueous mixtures of  $[\text{C}_2\text{C}_{1\text{im}}][\text{C}_8\text{F}_{17}\text{SO}_3]$  at 300 K. The blue colour represents H atom of cations attached to the carbon between nitrogen atoms of the imidazolium ring and light blue depicts water O atom. The isosurface value is 70% of the maximum number density.

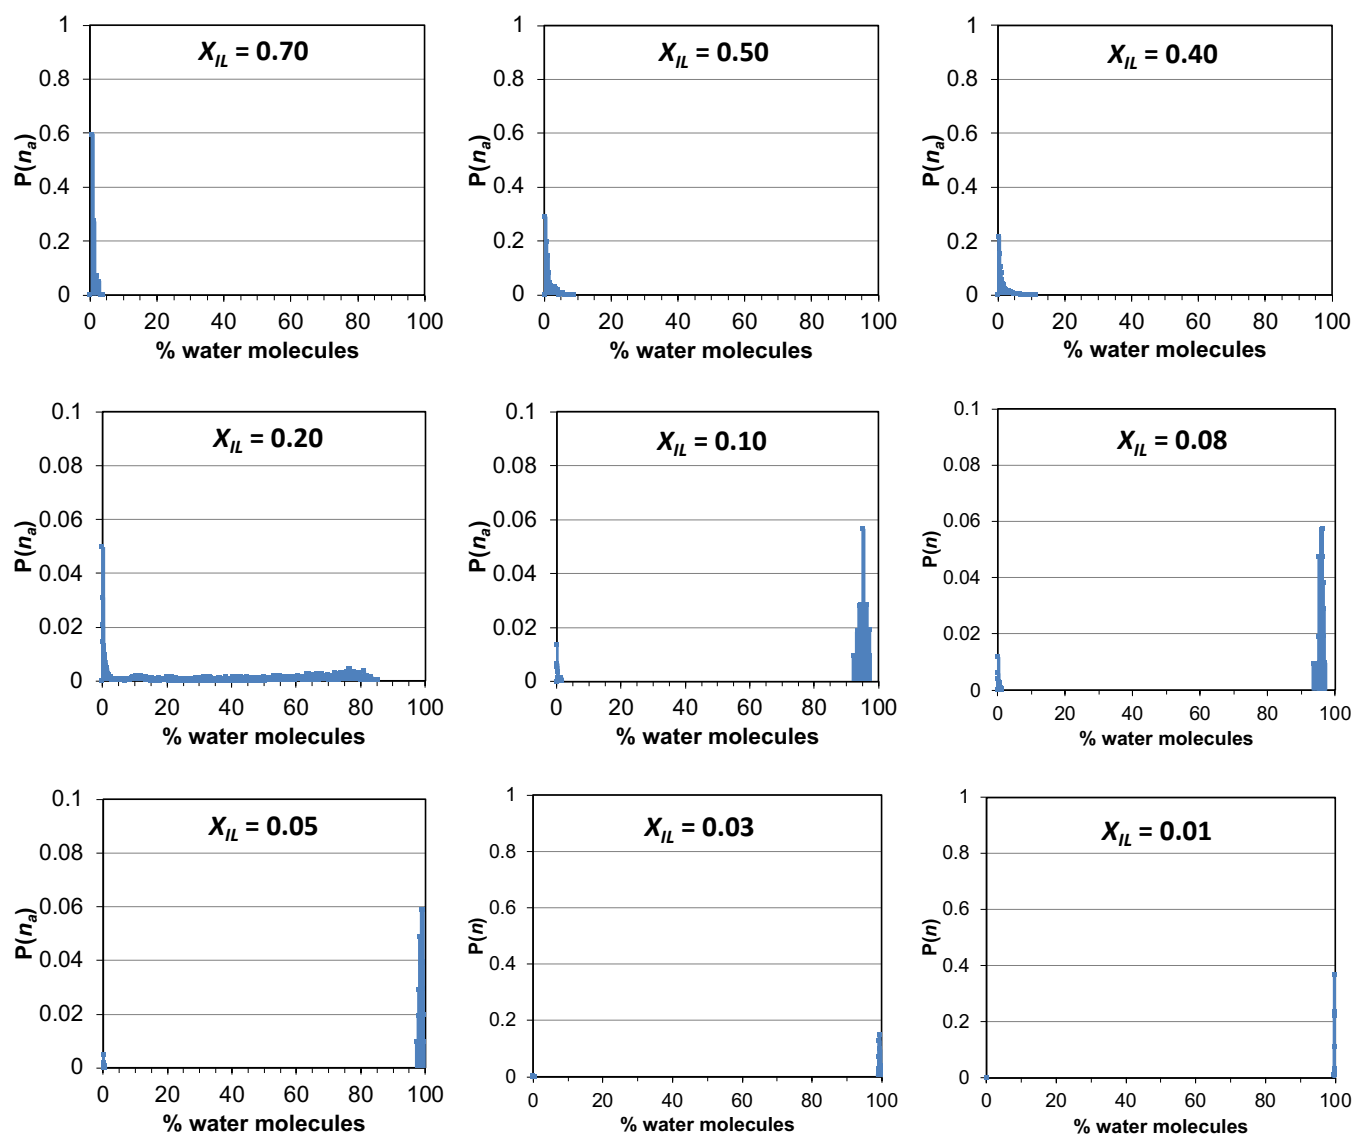

**Figure S14.** Discrete probability distribution of aggregate sizes,  $P(n_a)$ , as a function of aggregate size number,  $n_a$ , for water-water aggregates found in aqueous solutions of  $[N_{1\ 2OH\ 2OH\ 2OH}][NTf_2]$  at 300 K.
